# Supplementary material for: Fullerene and ruthenium dual end-functionalized thermosensitive polymers: synthesis, characterization, electrochemical properties, and self-assembly
Source: Royal Society of Chemistry journal article supplement (doi:10.1039/b805449e), 2008-01-01
Supplement: b805449e.pdf [file b805449e.pdf]

## Supplementary Information for

# Fullerene and Ruthenium Dual End-Functionalized Thermosensitive Polymers: Synthesis, Characterization, Electrochemical Properties, and Self-assembly<sup>†</sup>

Guangchang Zhou,<sup>a‡</sup> Jibao He,<sup>b</sup> Issifu I. Harruna,<sup>\*a</sup> and Kurt E. Geckeler<sup>\*c</sup>

<sup>a</sup>Department of Chemistry, Clark Atlanta University, 223 James P. Brawley Drive SW, Atlanta, GA 30314, USA, <sup>b</sup>Coordinated Instrumentation Facility, Tulane University, New Orleans, LA 70118, USA,

<sup>c</sup>Department of Materials Science and Engineering, Gwangju Institute of Science and Technology (GIST), 1 Oryong-dong, Buk-gu, Gwangju 500-712, South Korea

E-mail: iharruna@cau.edu (I.I.H.); keg@gist.ac.kr (K.E.G)

### Fluorescence Microscopy

An inverted Olympus light microscope with a fluorescent attachment and an Optronics CCD camera was used to image fluorescent samples. Image-Pro Plus from Media Cybernetics Inc. was the software used to image the samples.

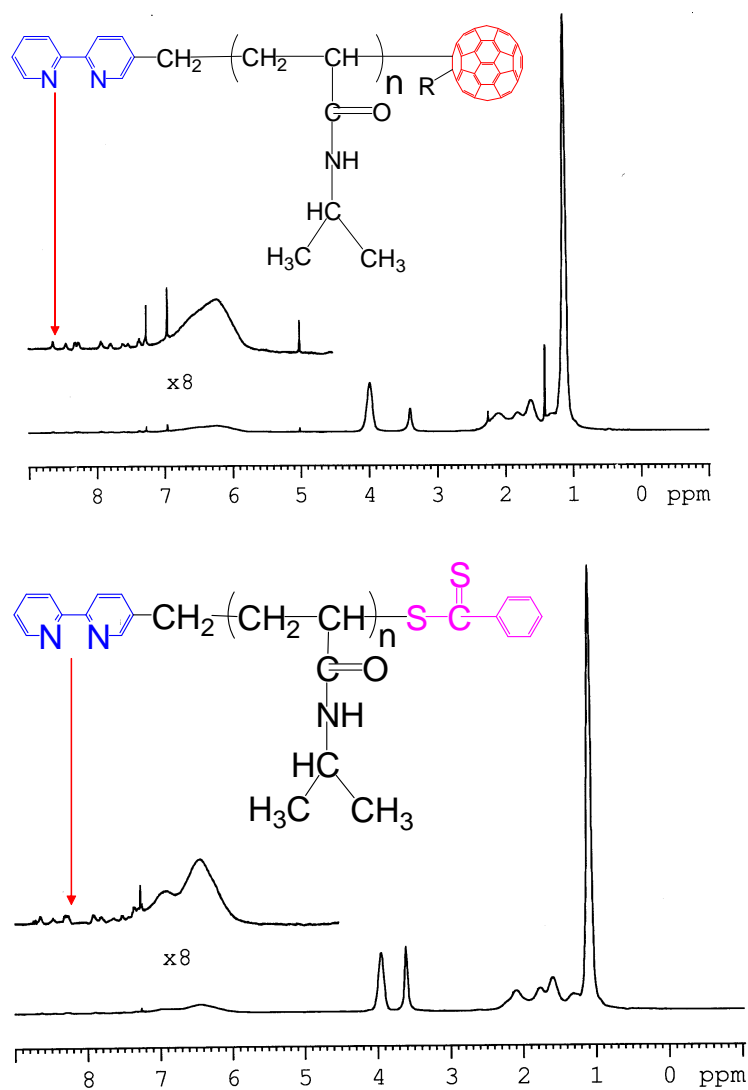

**Figure S1.** <sup>1</sup>H NMR spectra (CDCl<sub>3</sub>) of the representative fullerene and bipyridine-terminated poly(N-isopropylacrylamide) macroligand **Bpy-PNIPAM<sub>78</sub>-C<sub>60</sub>** (top) and its corresponding precursor **Bpy-PNIPAM<sub>78</sub>-S-C(=S)-Ph** (down).

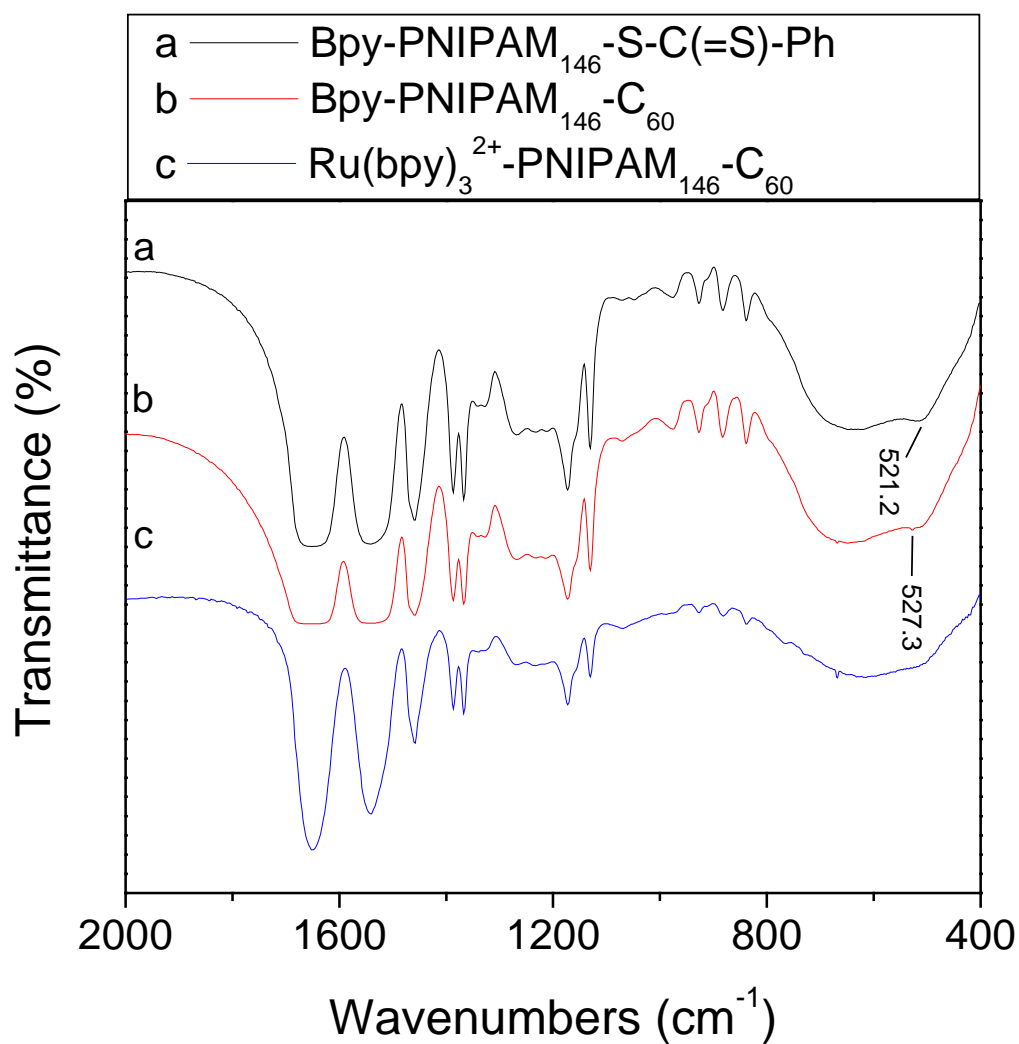

**Figure S2.** FT-IR spectra (KBr) of the fullerene end-functionalized metallopolymer, **Ru(bpy)<sub>3</sub><sup>2+</sup>-PNIPAM<sub>146</sub>-C<sub>60</sub>** and its corresponding fullerene and bipyridine-terminated PNIPAM macroligand **Bpy-PNIPAM<sub>146</sub>-C<sub>60</sub>** and precursor **Bpy-PNIPAM<sub>146</sub>-S-C(=S)-Ph**.

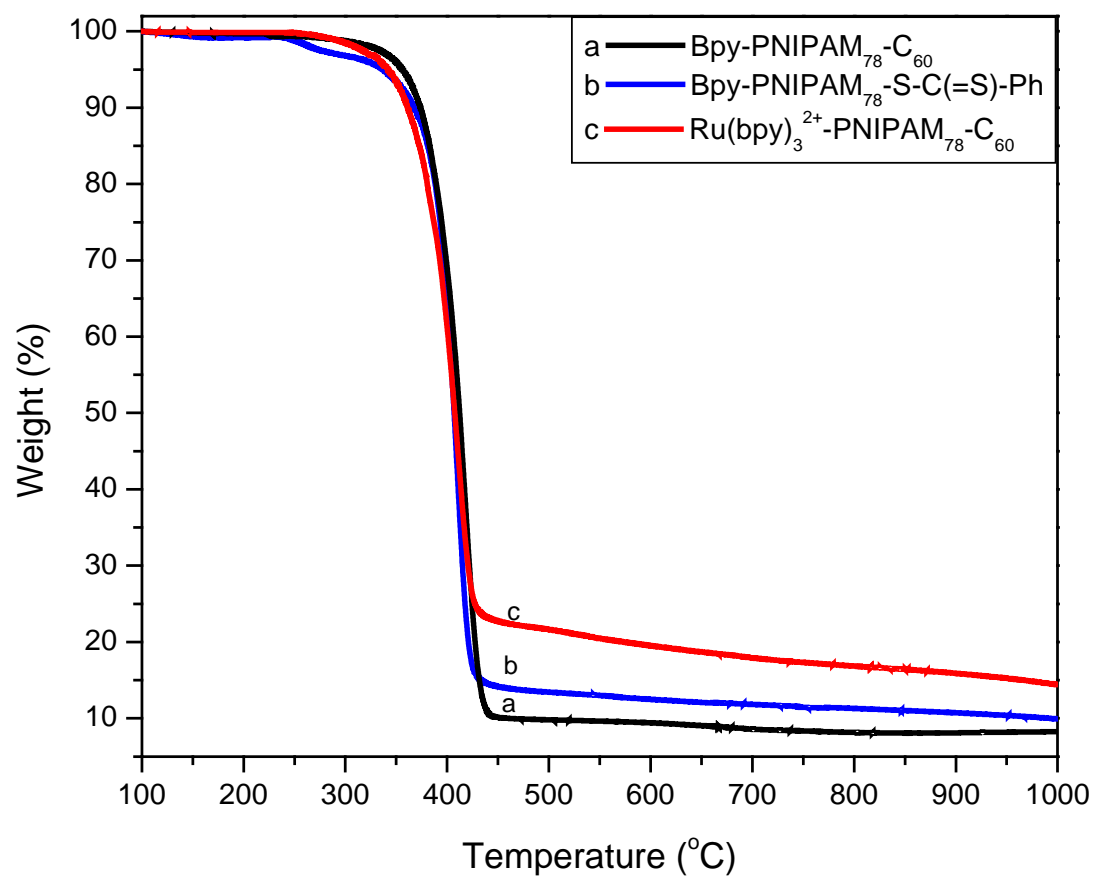

**Figure S3.** TGA traces of the fullerene end-functionalized metallopolymers  $\text{Ru}(\text{bpy})_3^{2+}\text{-PNIPAM}_{78}\text{-C}_{60}$  and their corresponding fullerene and bipyridine-terminated PNIPAM macroligands  $\text{Bpy-PNIPAM}_{78}\text{-S-C(=S)-Ph}$  precursor polymers  $\text{Bpy-PNIPAM}_{78}\text{-C}_{60}$ .

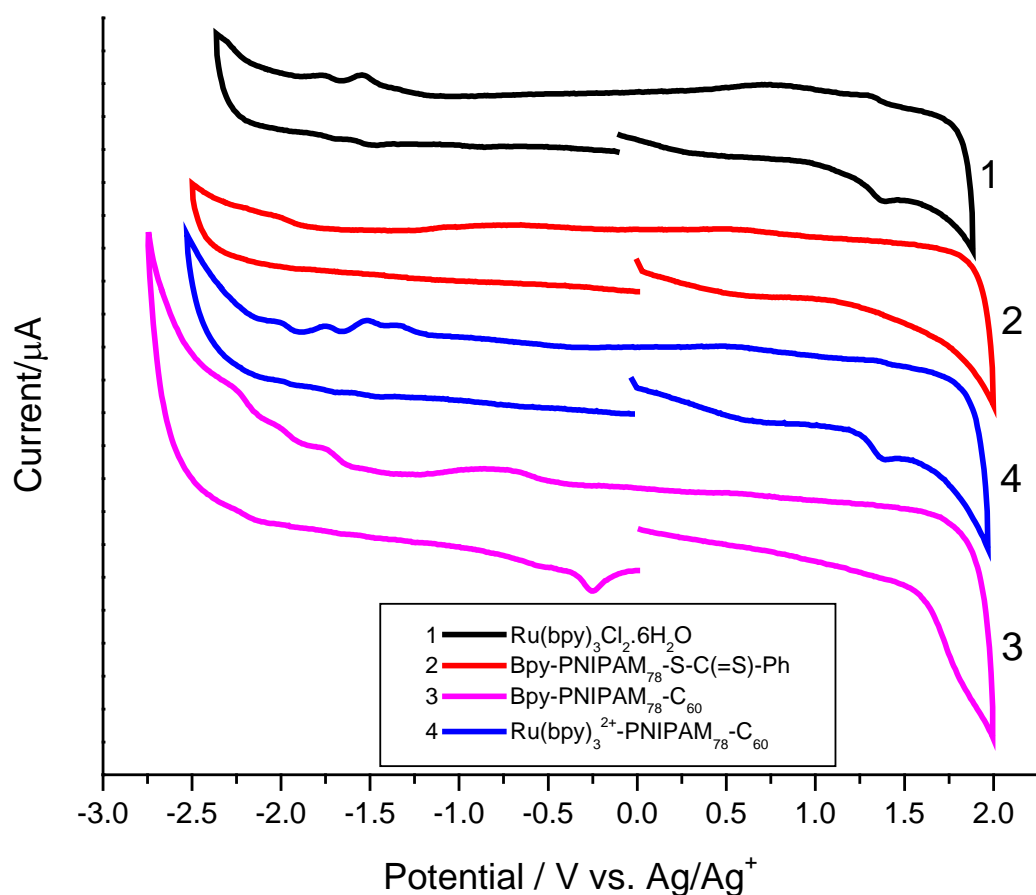

**Figure S4.** Cyclic voltammograms of the fullerene end-functionalized metallopolymer, **Ru(bpy)<sub>3</sub><sup>2+</sup>-PNIPAM<sub>78</sub>-C<sub>60</sub>** and its corresponding fullerene and bipyridine-terminated PNIPAM macroligand **Bpy-PNIPAM<sub>78</sub>-C<sub>60</sub>** and precursor polymer **Bpy-PNIPAM<sub>78</sub>-S-C(=S)-Ph** as well as Ru(bpy)<sub>3</sub>Cl<sub>2</sub>·6H<sub>2</sub>O in CH<sub>3</sub>CN containing 0.1 M Bu<sub>4</sub>NPF<sub>6</sub> at a scan rate of 500 mVs<sup>-1</sup> at room temperature (all sample concentrations were 1×10<sup>-4</sup> M).

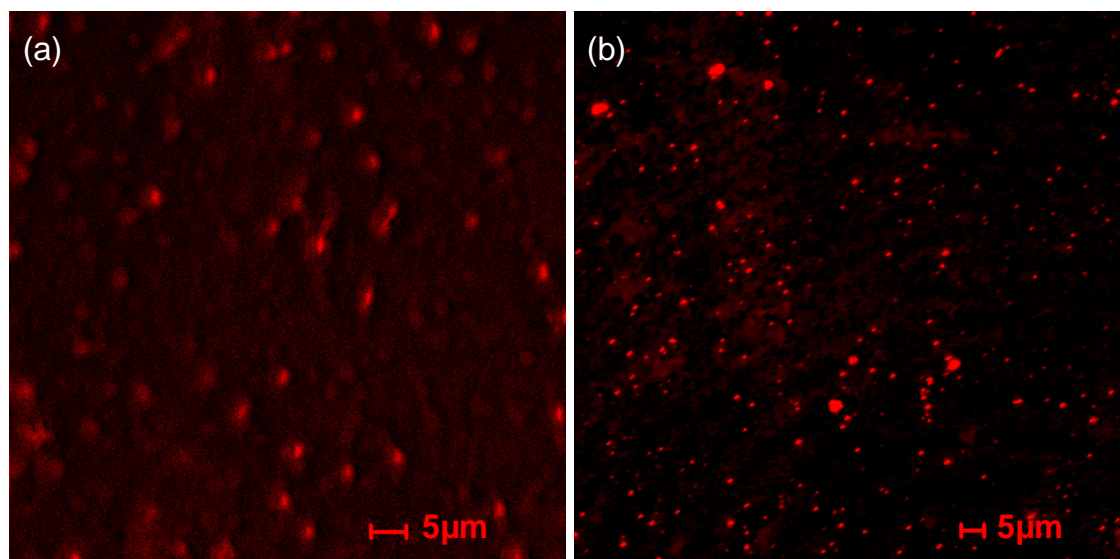

**Figure S5.** Fluorescence microscopic images of the fullerene- and tris(bipyridine)ruthenium-terminated poly(N-isopropylacrylamide) metallopolymer, **Ru(bpy)<sub>3</sub><sup>2+</sup>-PNIPAM<sub>78</sub>-C<sub>60</sub>** (a) and **Ru(bpy)<sub>3</sub><sup>2+</sup>-PNIPAM<sub>146</sub>-C<sub>60</sub>** (b) (in water, sample concentration: 5.0 mg/ml).
